# Supplementary material for: Systematic investigation of the synthesis and light-absorption broadening of a novel diketopyrrolopyrrole conjugated polymer of low and high molecular weight with thermo-labile groups
Source: Royal Society of Chemistry journal article supplement (doi:10.1039/c5py01086a), 2015-01-01
Supplement: c5py01086a1.pdf [file c5py01086a1.pdf]

## Electronic Supplementary Information (ESI)

### **Systematic investigation on synthesis and light-absorption broadening of a novel diketopyrrolopyrrole conjugated polymer of low and high molecular weight with thermo-labile groups**

Long Yang,<sup>a</sup> Yuyan Yu,<sup>a</sup> Yulong Gong,<sup>b</sup> Jiarong Li,<sup>a</sup> Feijie Ge,<sup>a</sup> Long Jiang,<sup>a,\*</sup>

Fang Gao,<sup>b</sup> and Yi Dan<sup>a,\*</sup>

<sup>a</sup> State Key Laboratory of Polymer Materials Engineering of China ( Sichuan University)

Polymer Research Institute of Sichuan University, Chengdu 610065, China

<sup>b</sup> College of Chemistry and Chemical Engineering, Chongqing University, Chongqing 400044, China

\* Corresponding author, telephone: +86-28-85407286, fax number: +86-028-85402465, e-mail:

[danyichenweiwei@163.com](mailto:danyichenweiwei@163.com), [jianglong@scu.edu.cn](mailto:jianglong@scu.edu.cn).

## List of Contents for Supplementary Materials:

|                                                                                                        |     |
|--------------------------------------------------------------------------------------------------------|-----|
| Figure S1. HNMR chart of DPP-Thio in d-DMSO .....                                                      | S1  |
| Figure S2. HNMR chart of DPP-Thio-R in CDCl <sub>3</sub> .....                                         | S1  |
| Figure S3. HNMR chart of DPP-Thio-Br in CDCl <sub>3</sub> .....                                        | S2  |
| Figure S4. CNMR chart of DPP-Thio-Br in CDCl <sub>3</sub> .....                                        | S2  |
| Figure S5. HNMR chart of Car-Boc-Br in CDCl <sub>3</sub> .....                                         | S3  |
| Figure S6. HNMR chart of Car-Bor in d-DMSO .....                                                       | S3  |
| Figure S7. HNMR chart of Car-Bor in D <sub>2</sub> O and d-DMSO .....                                  | S4  |
| Figure S8. HNMR chart of chart of DPP-Car-Boc-Lin CDCl <sub>3</sub> .....                              | S4  |
| Figure S9. GPC results of DPP-Car-Boc-L .....                                                          | S5  |
| Figure S10. HNMR chart of DPP-Car-Boc-H in d-chlorbenzene .....                                        | S6  |
| Figure S11. MALDI-TOF spectrum of DPP-Car-Boc-L.....                                                   | S6  |
| Figure S12. MALDI-TOF spectrum of DPP-Car-Boc-H.....                                                   | S7  |
| Figure S13. Linear fit of the temperature-dependant absorption maximum of DPP-Car-Boc<br>polymers..... | S7  |
| Figure S14. Temperature-dependant absorption properties of DPP-Car-Hand DPP-Car-L.....                 | S7  |
| Figure S15. Linear fit of the temperature-dependant absorption maximum of DPP-Car polymers<br>.....    | S8  |
| Figure S16. TGA thermograms of DPP-Car-Boc-L .....                                                     | S8  |
| Figure S17. TGA thermograms of DPP-Car-Boc-H .....                                                     | S8  |
| Figure S18. Excitation spectra of DPP-Car-Boc-L in chlorobenzene solution.....                         | S9  |
| Figure S19. Excitation spectra of DPP-Car-Boc-H in chlorobenzene solution.....                         | S9  |
| Figure S20. Excitation spectra of DPP-Car-Boc-L and DPP-Car-Boc-H in thin film.....                    | S9  |
| Figure S21. Cyclic voltammograms of DPP-Car-Boc-L and DPP-Car-L.....                                   | S10 |

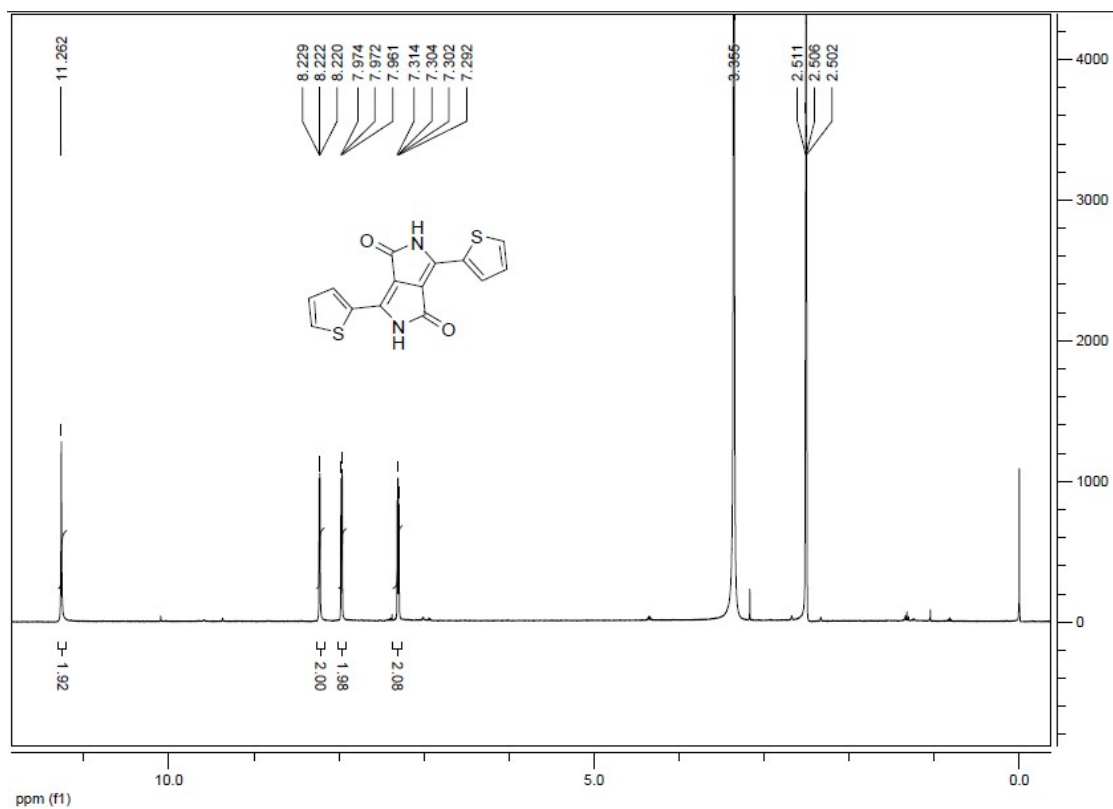

Figure S1. <sup>1</sup>H-NMR chart of DPP-Thio.

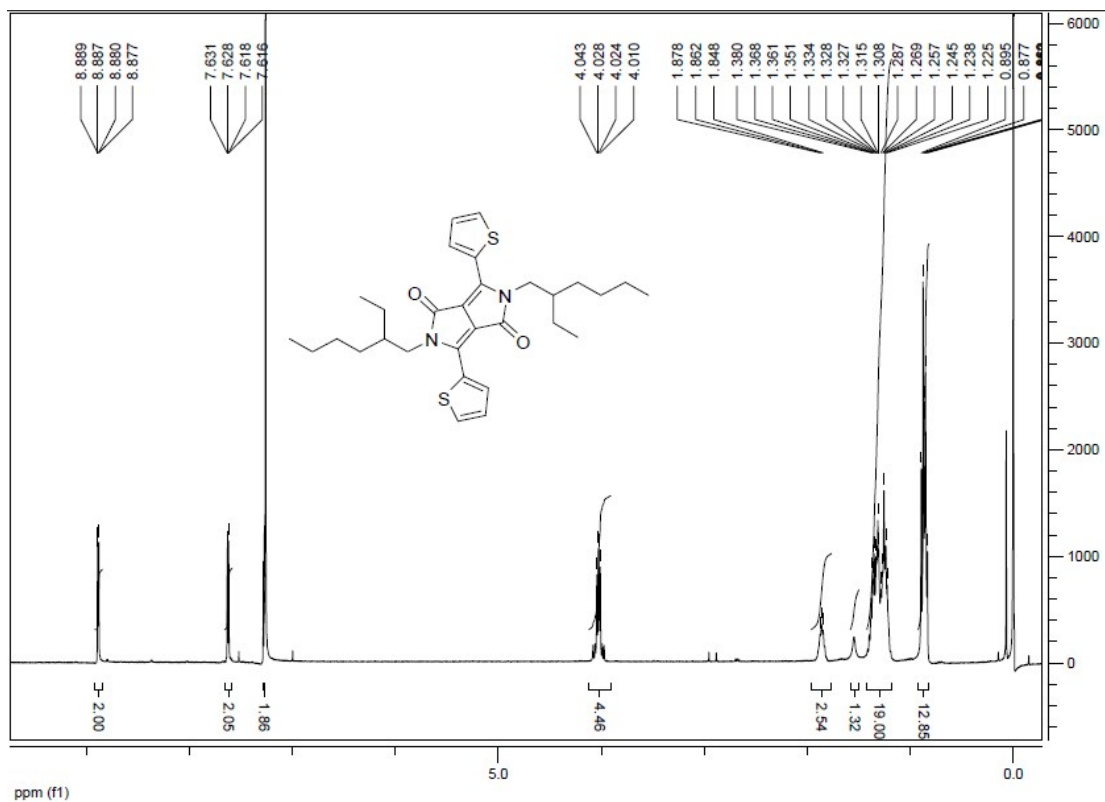

Figure S2. <sup>1</sup>H-NMR chart of DPP-Thio-R.

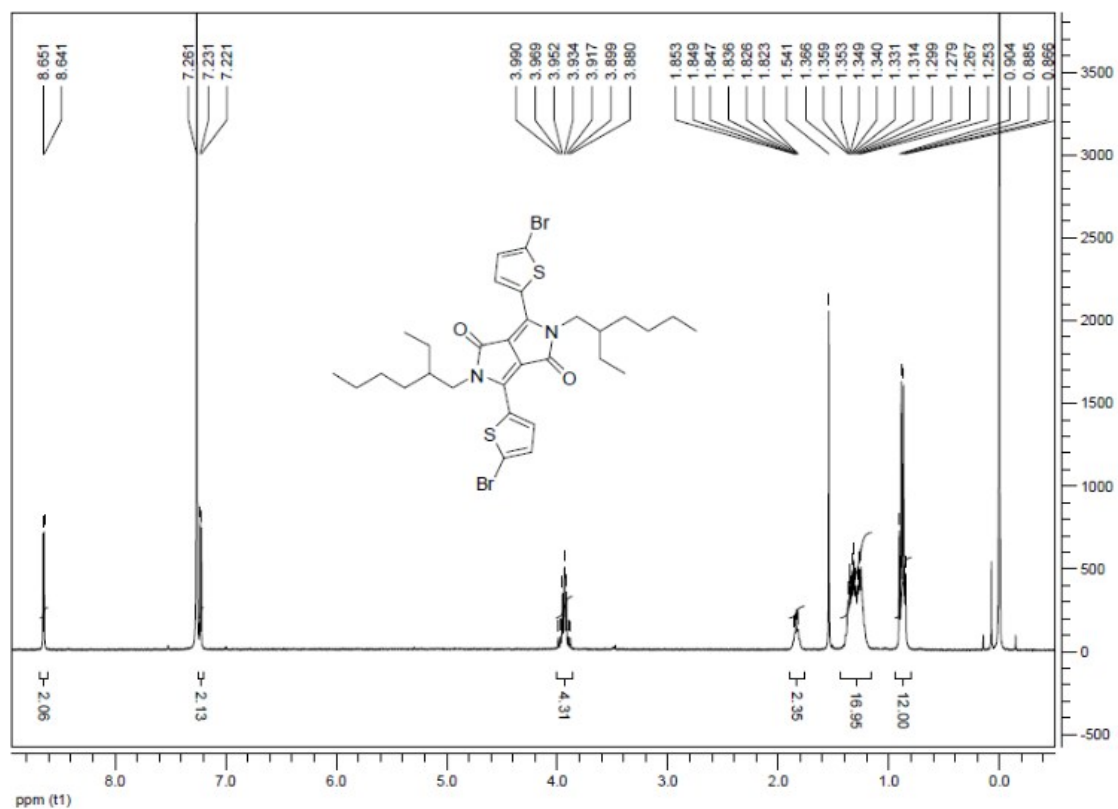

Figure S3.  $^1\text{H}$ -NMR chart of DPP-Thio-Br.

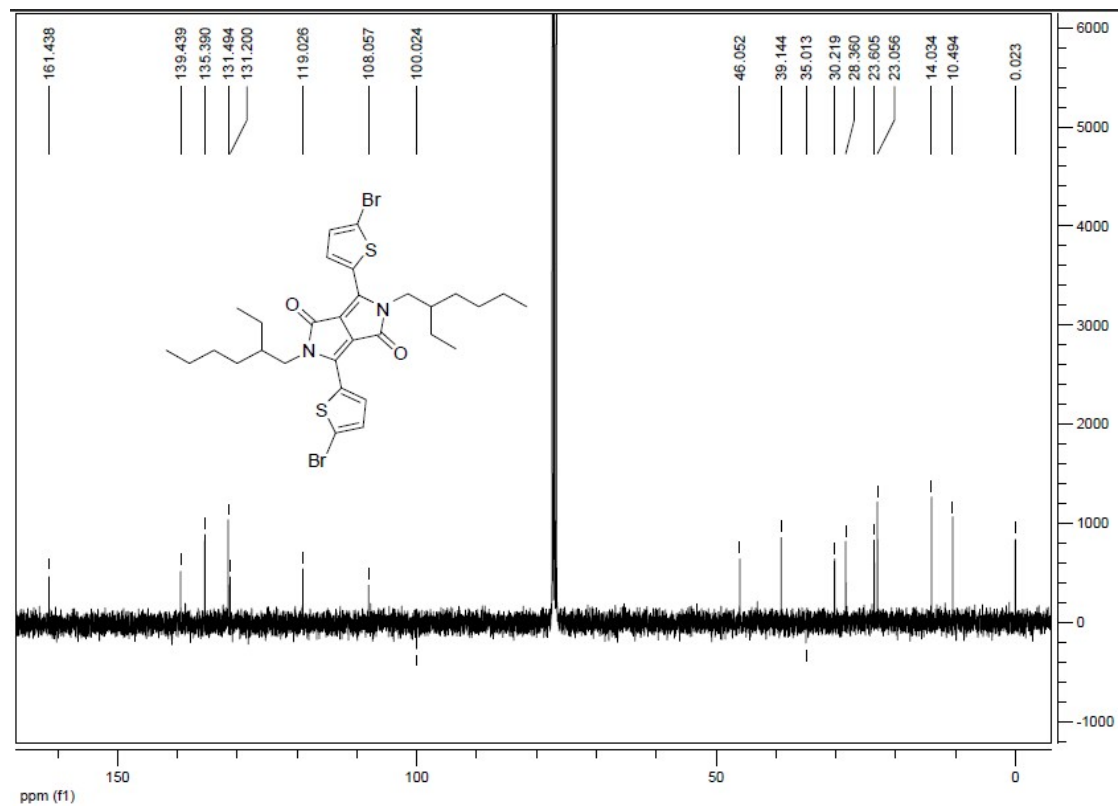

Figure S4.  $^{13}\text{C}$ -NMR chart of DPP-Thio-Br.

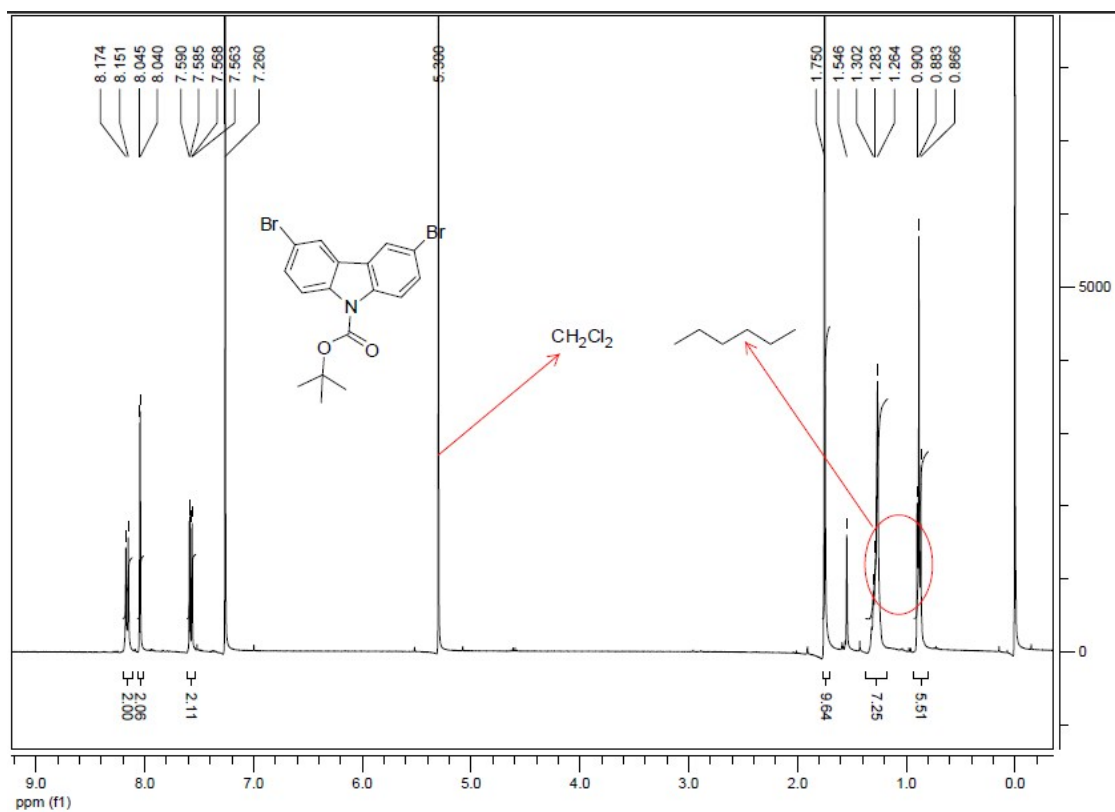

Figure S5. <sup>1</sup>H-NMR chart of Car-Boc-Br.

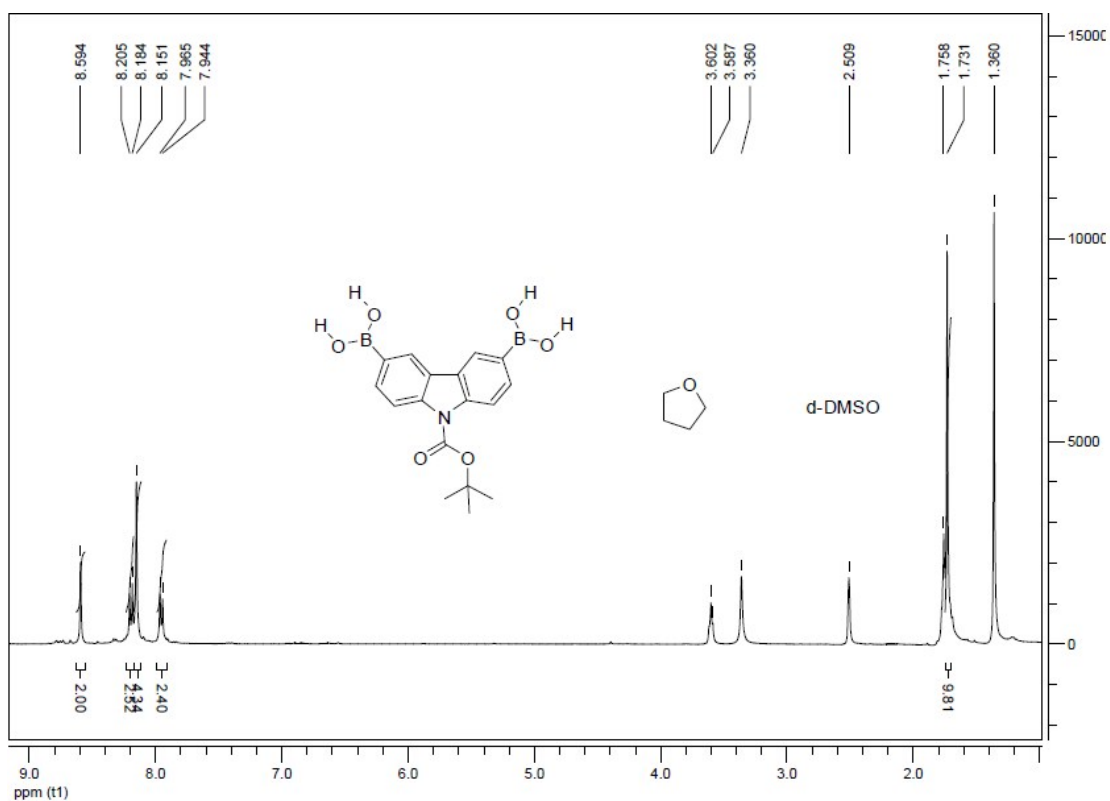

Figure S6. <sup>1</sup>H-NMR chart of Car-Bor in d-DMSO.

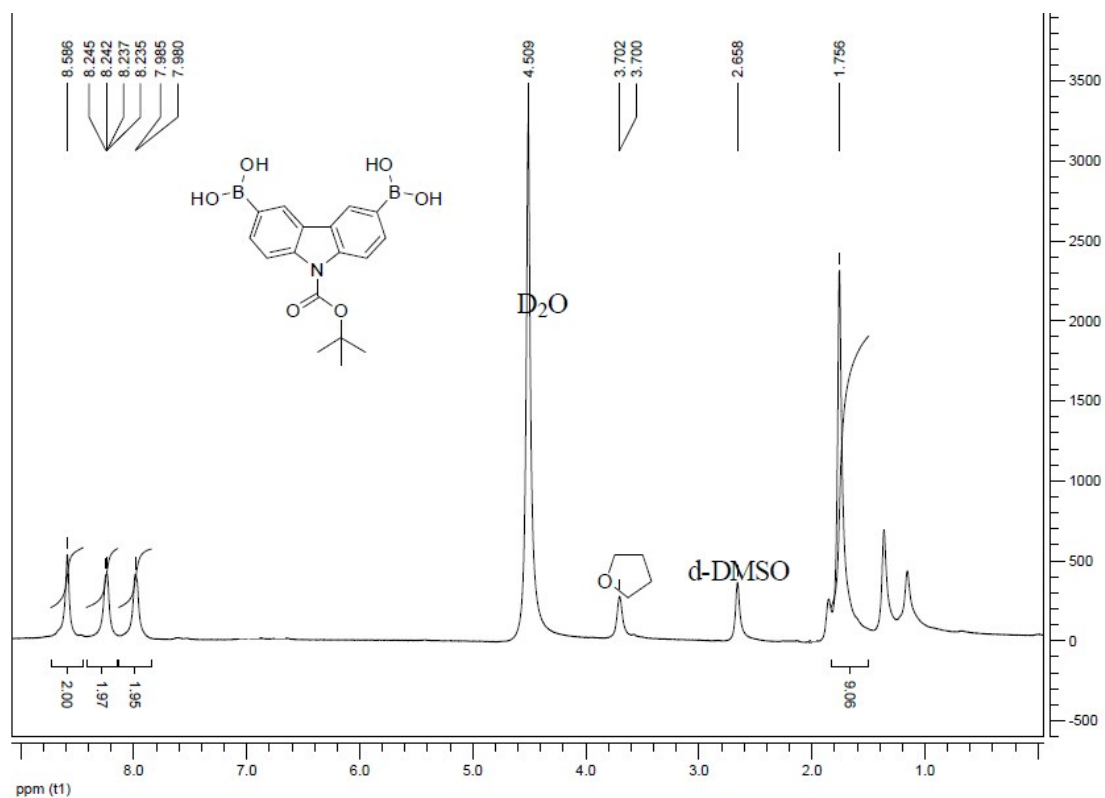

Figure S7.  $^1\text{H-NMR}$  chart of Car-Bor in  $\text{D}_2\text{O}$  and d-DMSO.

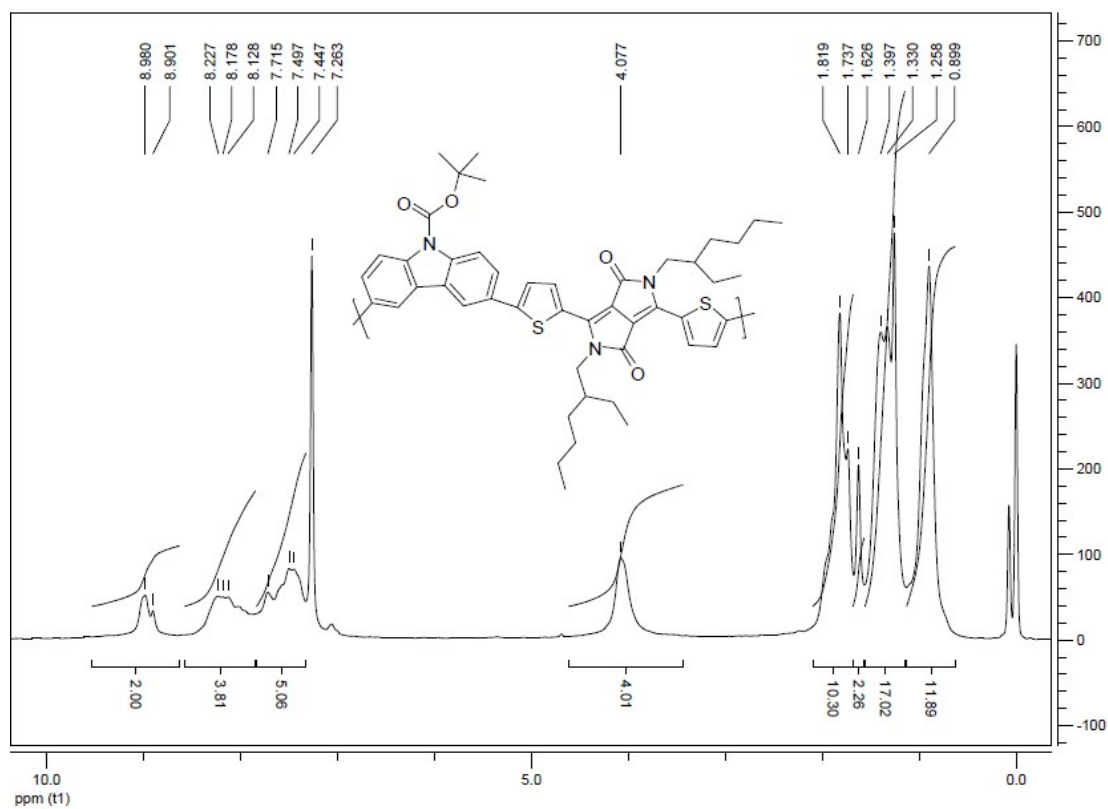

Figure S8.  $^1\text{H-NMR}$  chart of DPP-Car-Boc-L.

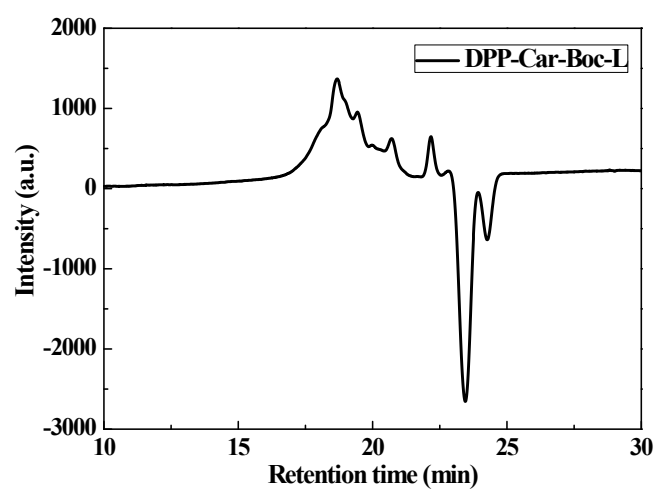

GPC Results

|                                     |          |
|-------------------------------------|----------|
| Peak#:1 (Detector A Ch1)            |          |
| [Average Molecular Weight]          |          |
| Number Average Molecular Weight(Mn) | 2818     |
| Weight Average Molecular Weight(Mw) | 3320     |
| Z Average Molecular Weight(Mz)      | 3883     |
| Z+1 Average Molecular Weight(Mz1)   | 4463     |
| Mw/Mn                               | 1.17823  |
| Mz/Mw                               | 1.16946  |
| %                                   | 100.0000 |

Detector A Ch1

Figure S9. GPC results of the target conjugated polymer of DPP-Car-Boc-L

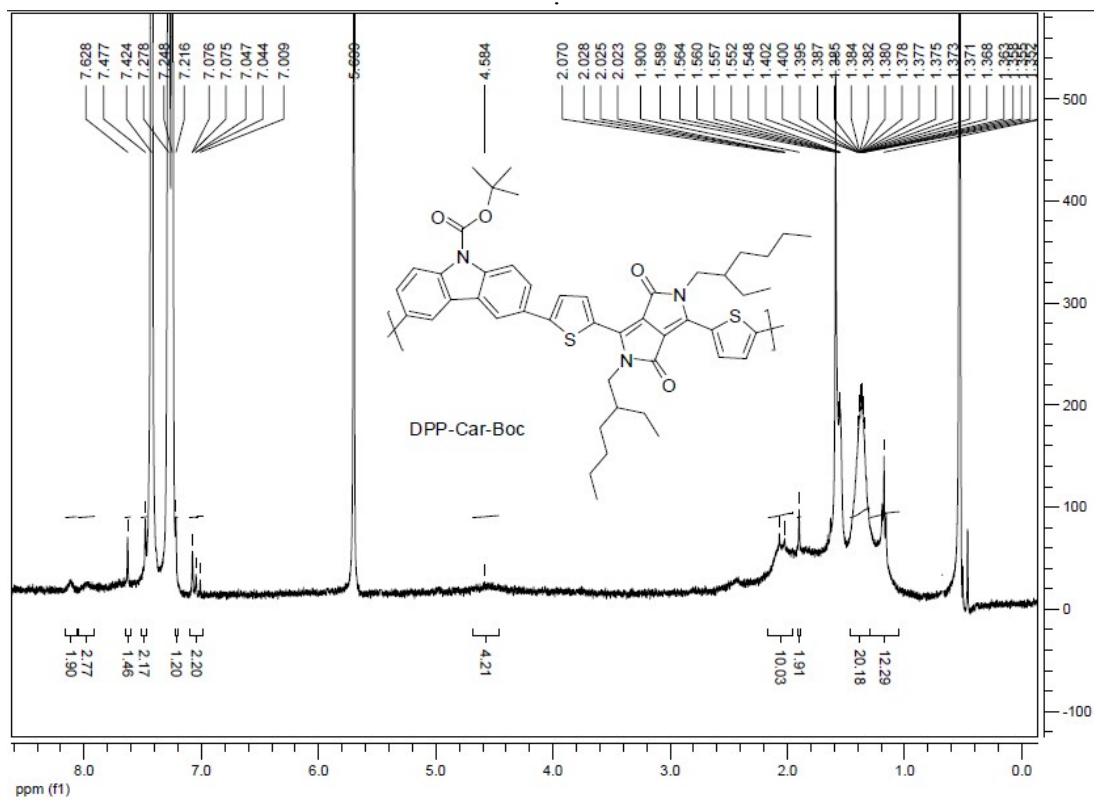

Figure S10.  $^1\text{H-NMR}$  chart of DPP-Car-Boc-H in d-chlorobenzene.

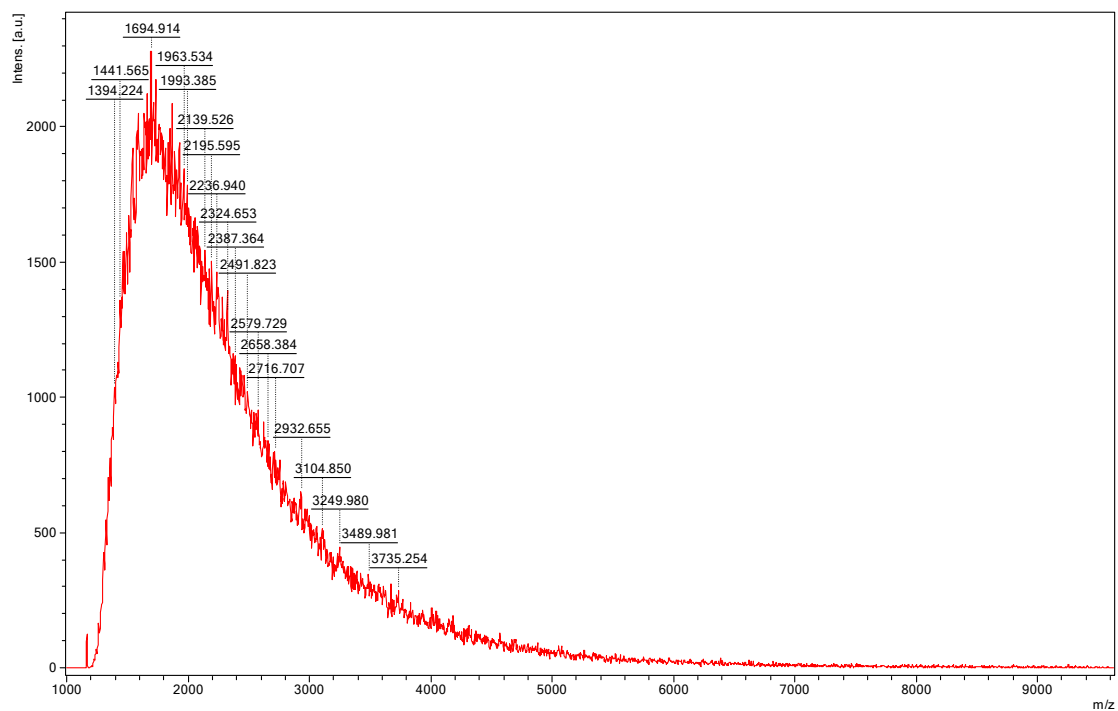

Figure S11. MALDI-TOF spectrum of DPP-Car-Boc-L.



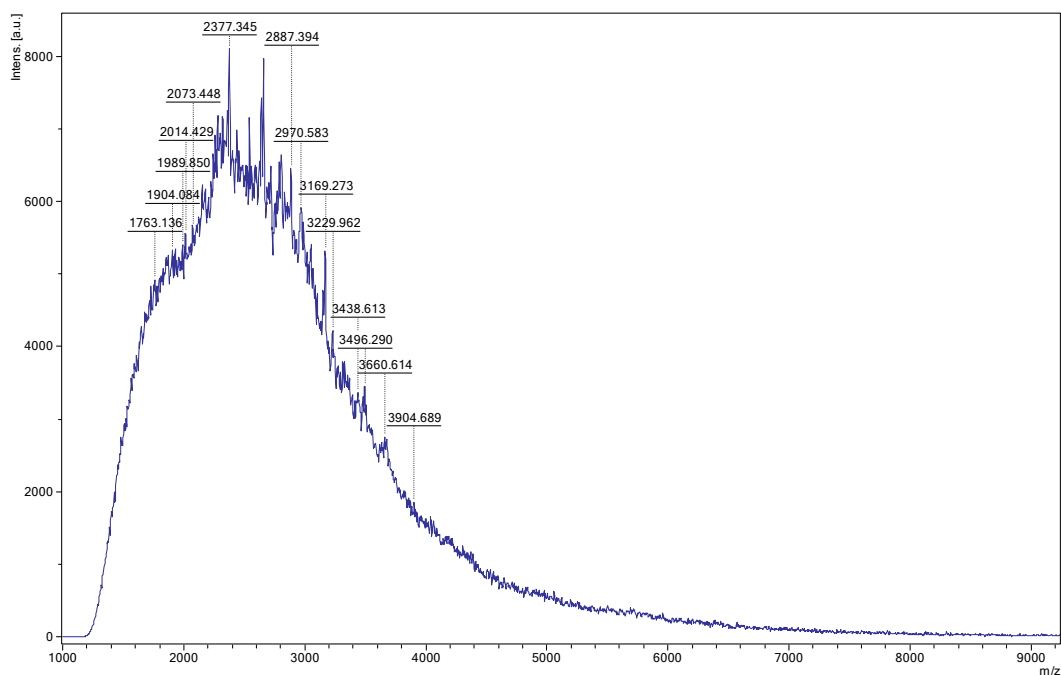

Figure S12. MALDI-TOF spectrum of DPP-Car-Boc-H.

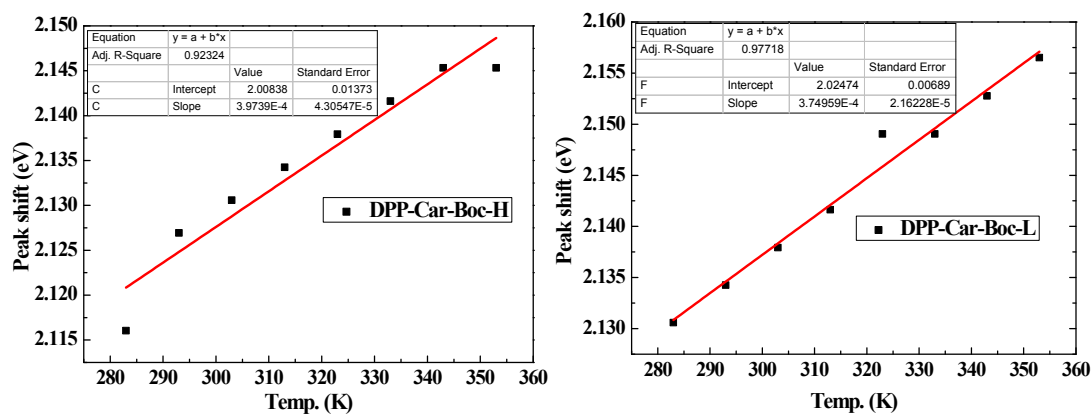

Figure S13. Linear fit of the temperature-dependant absorption maximum of DPP-Car-Boc polymers in chlorbenzene (CB) solution (0.01mg/ml).

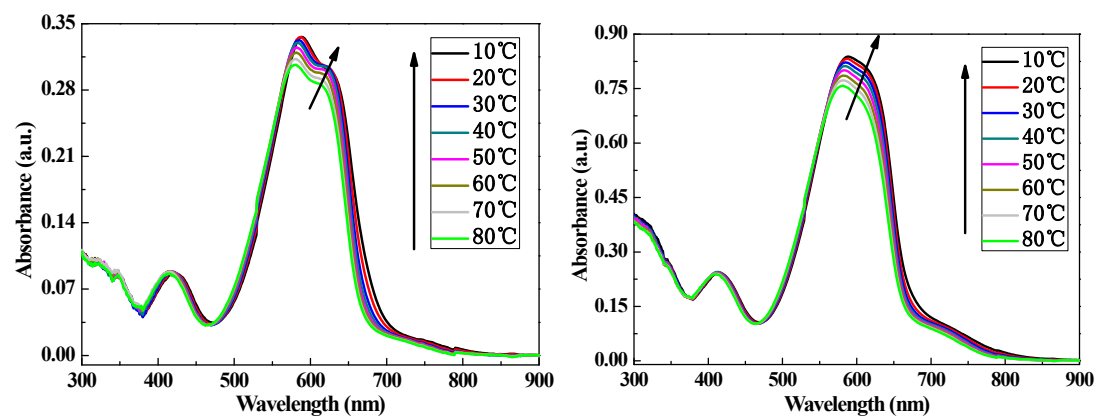

Figure S14. The temperature-dependant absorption properties of DPP-Car-H (Left) and DPP-Car-L (Right) in chlorbenzene (CB) solution (0.01mg/ml).

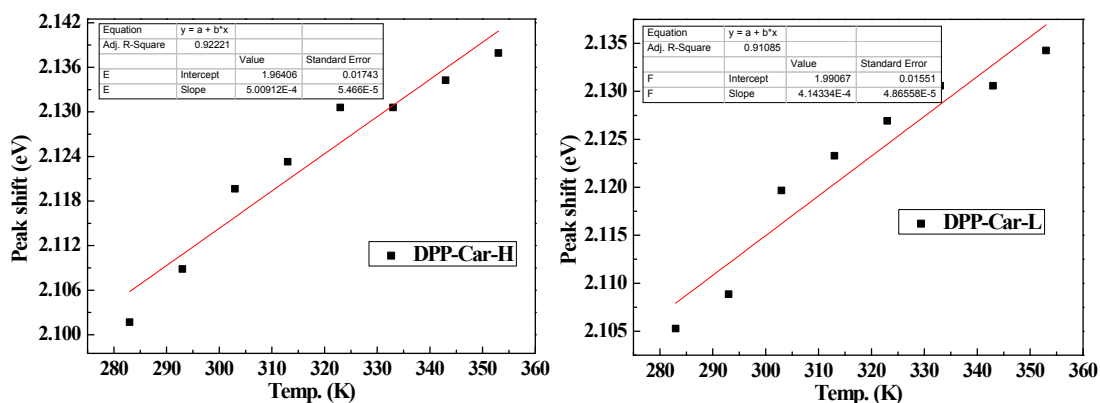

Figure S15. Linear fit of the temperature-dependant absorption maximum of DPP-Car polymers in chlorbenzene (CB) solution (0.01mg/ml).

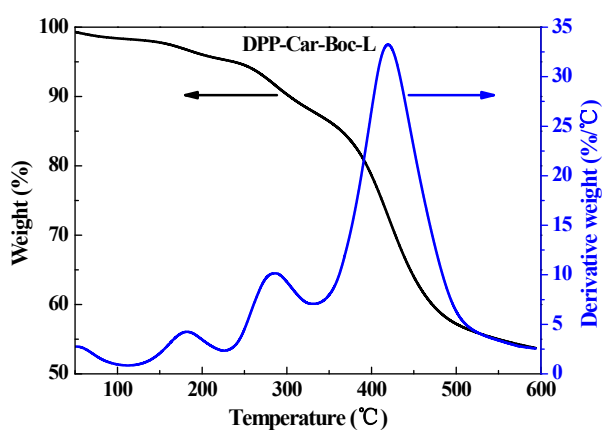

Figure S16. Thermogravimetric analysis of DPP-Car-Boc-L. A derivative weight loss curve has been included to indicate the point with the most apparent weight loss.

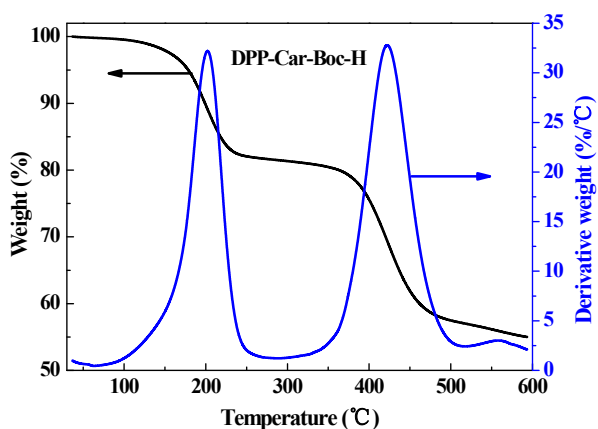

Figure S17. Thermogravimetric analysis of DPP-Car-Boc-H. A derivative weight loss curve has been included to indicate the point with the most apparent weight loss.

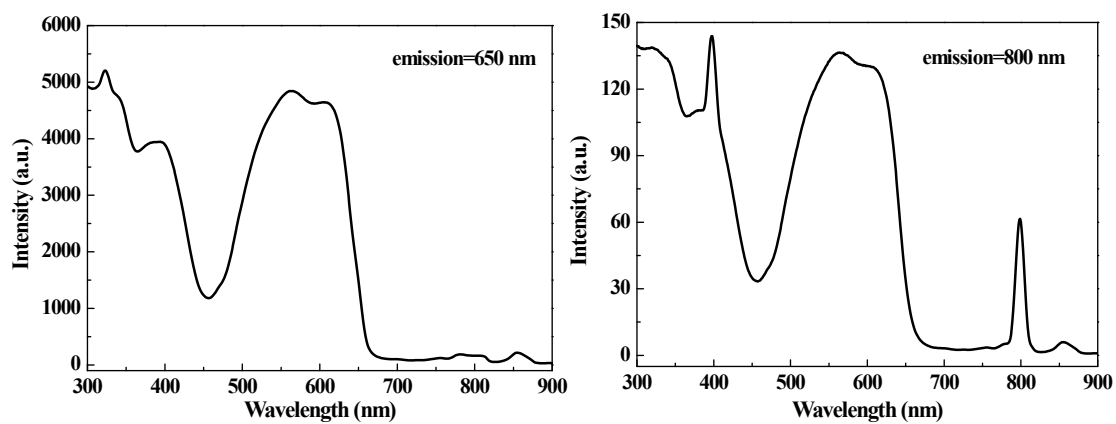

Figure S18. Excitation spectra of DPP-Car-Boc-L in chlorobenzene solution at room temperature.

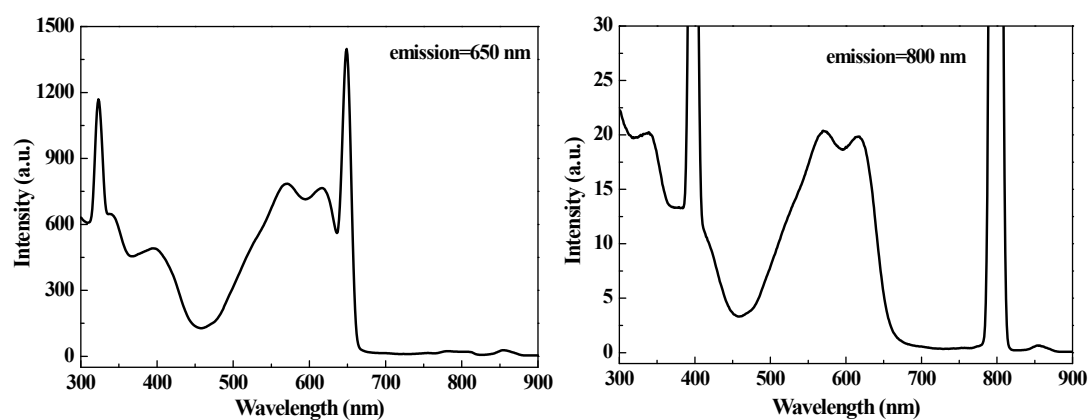

Figure S19. Excitation spectra of DPP-Car-Boc-H in chlorobenzene solution at room temperature.

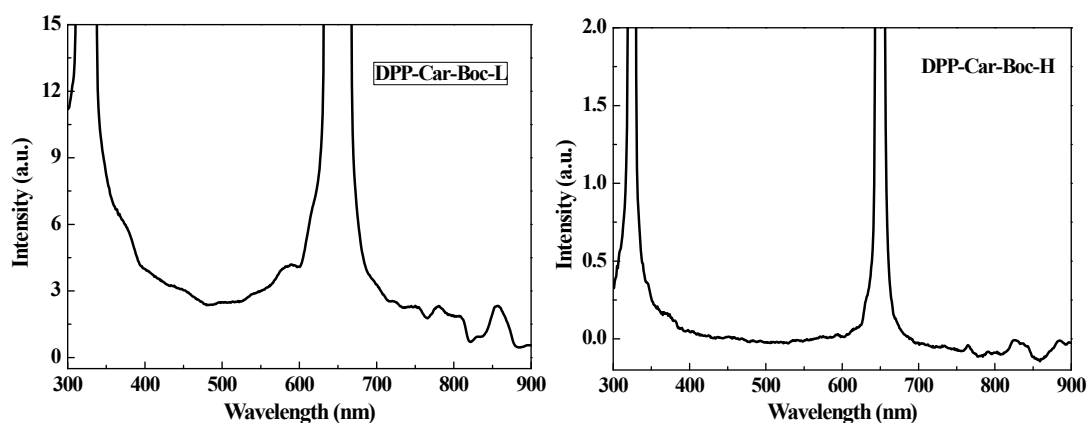

Figure S20. Excitation spectra of DPP-Car-Boc-L (left) and DPP-Car-Boc-H (right) in thin film at room temperature (Emission=650 nm).

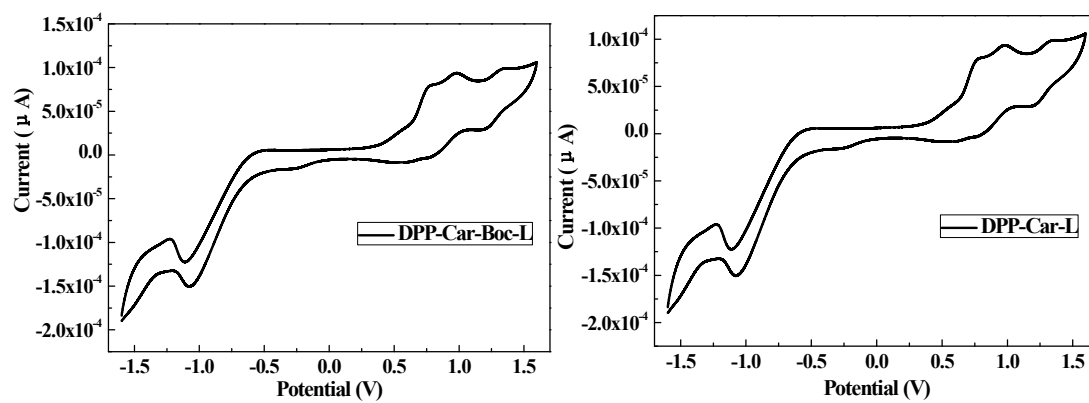

Figure S21. Cyclic voltammograms of DPP-Car-Boc-L (left) and DPP-Car-L (right).
